# Supplementary material
Source: PubMed Central journal article supplement (PMC3691699)

## Supplemental Figure Legend

Absolute number of peripheral blood CD8a/b<sup>+</sup> T cells and its subsets in samples from the four anti- $\alpha$ 4 $\beta$ 7 mAb treated and the four control animals. A) The data on the absolute number of CD8a/b<sup>+</sup> T cells is shown as a line diagram with solid lines representing the animals that received the anti-a4b7 mAb and the broken lines represent the control animals. The arrows at the bottom indicate the times the anti-a4b7 mAb was administered. The rest of the data shown are displayed as bar graphs for ease of display. Data shown are for B) CCR5 expressing CD8<sup>+</sup> T cells C) CD25 and FoxP3 expressing CD8<sup>+</sup> T cells.

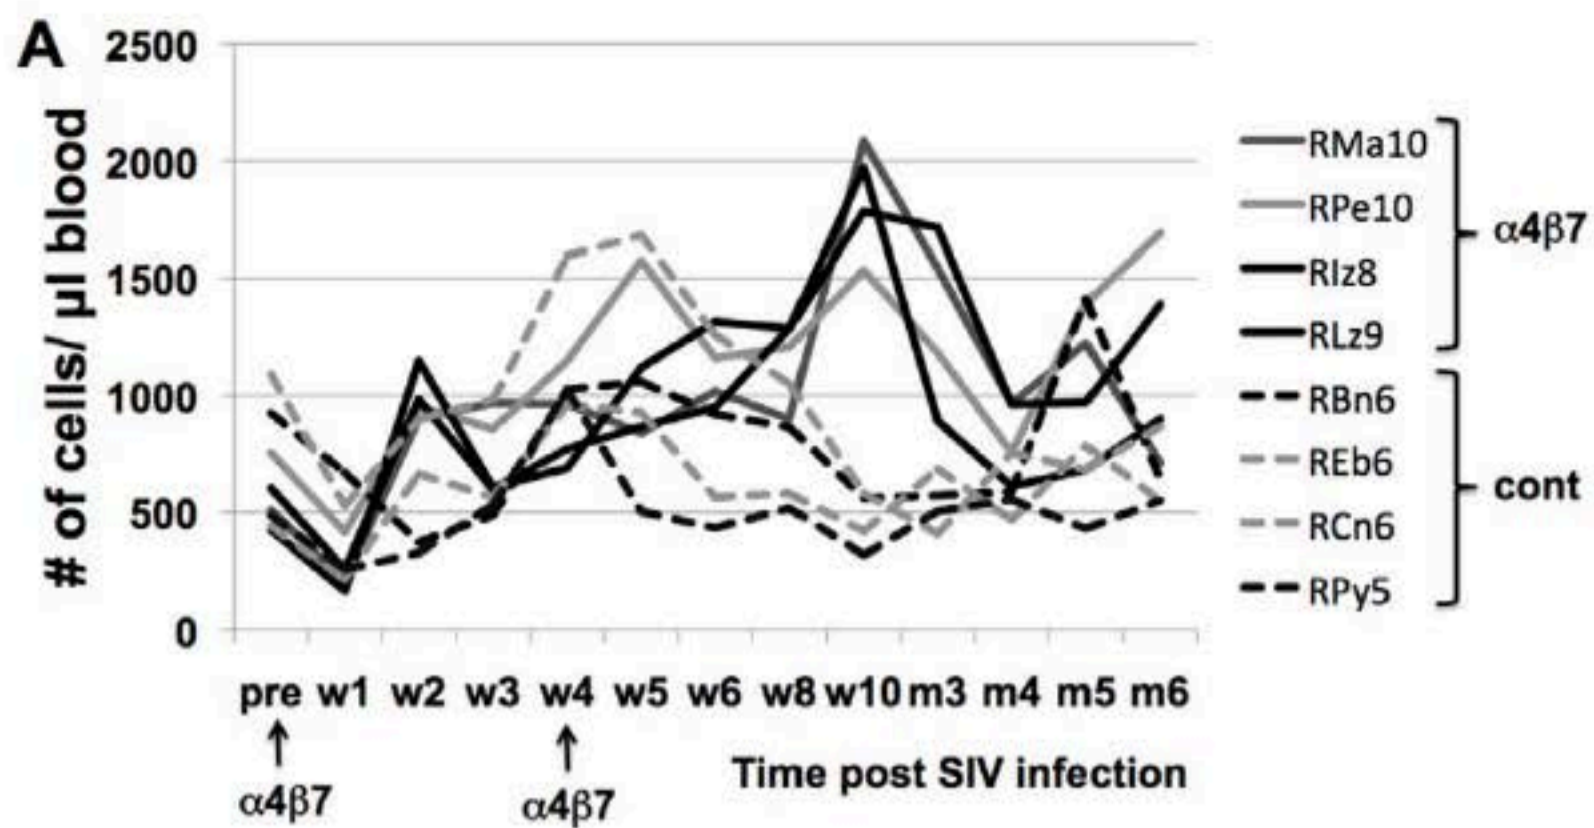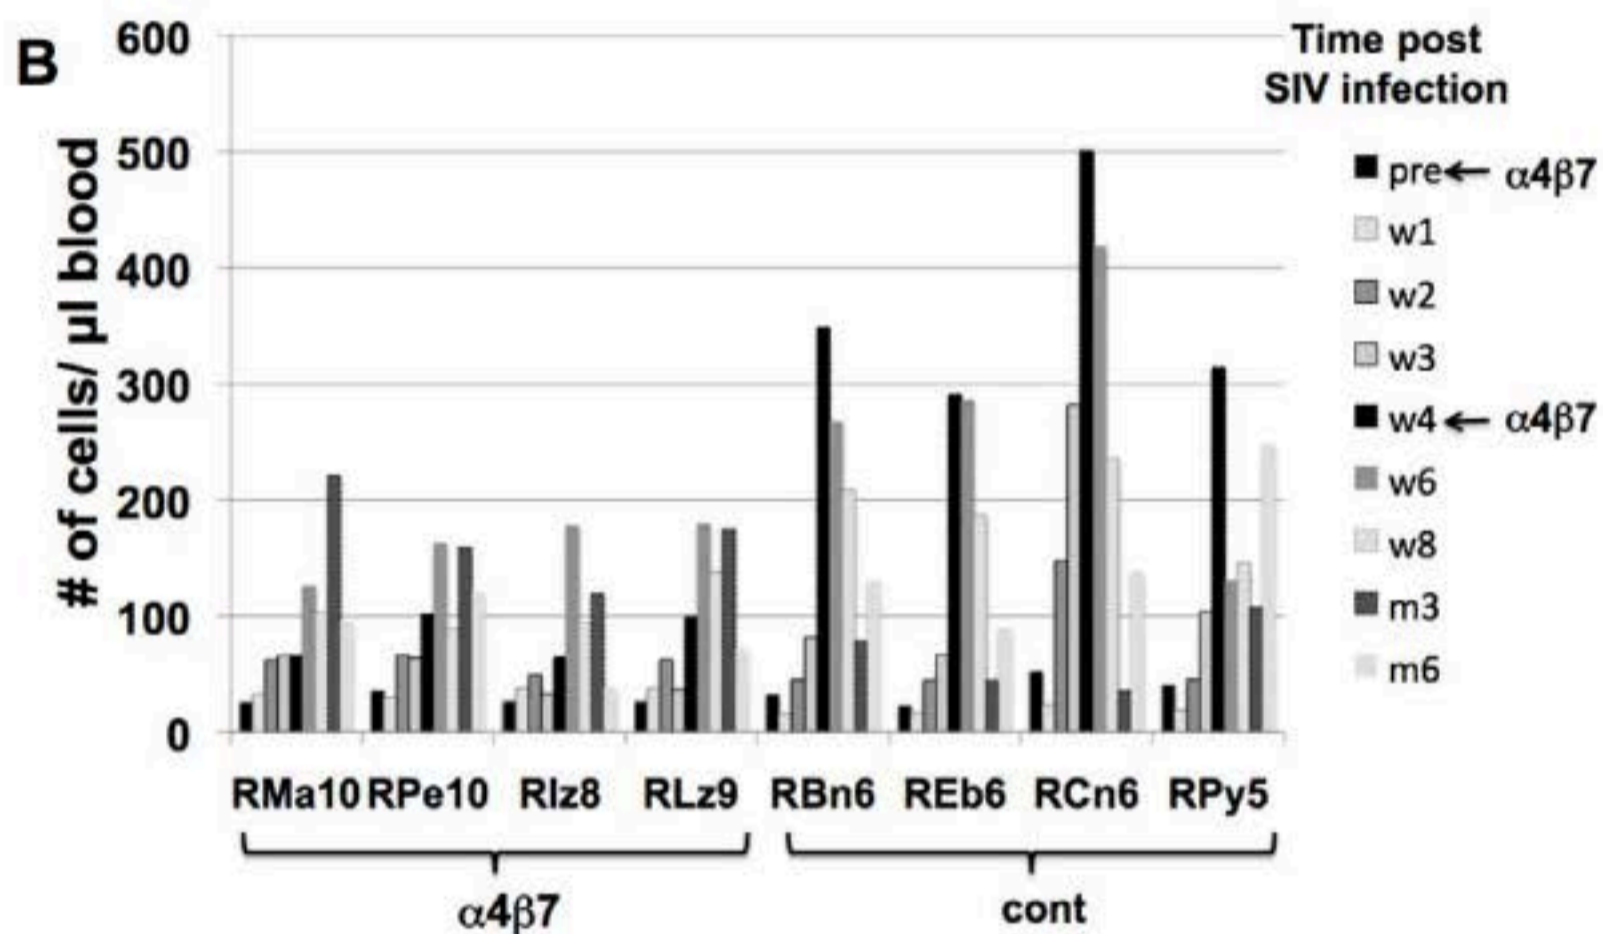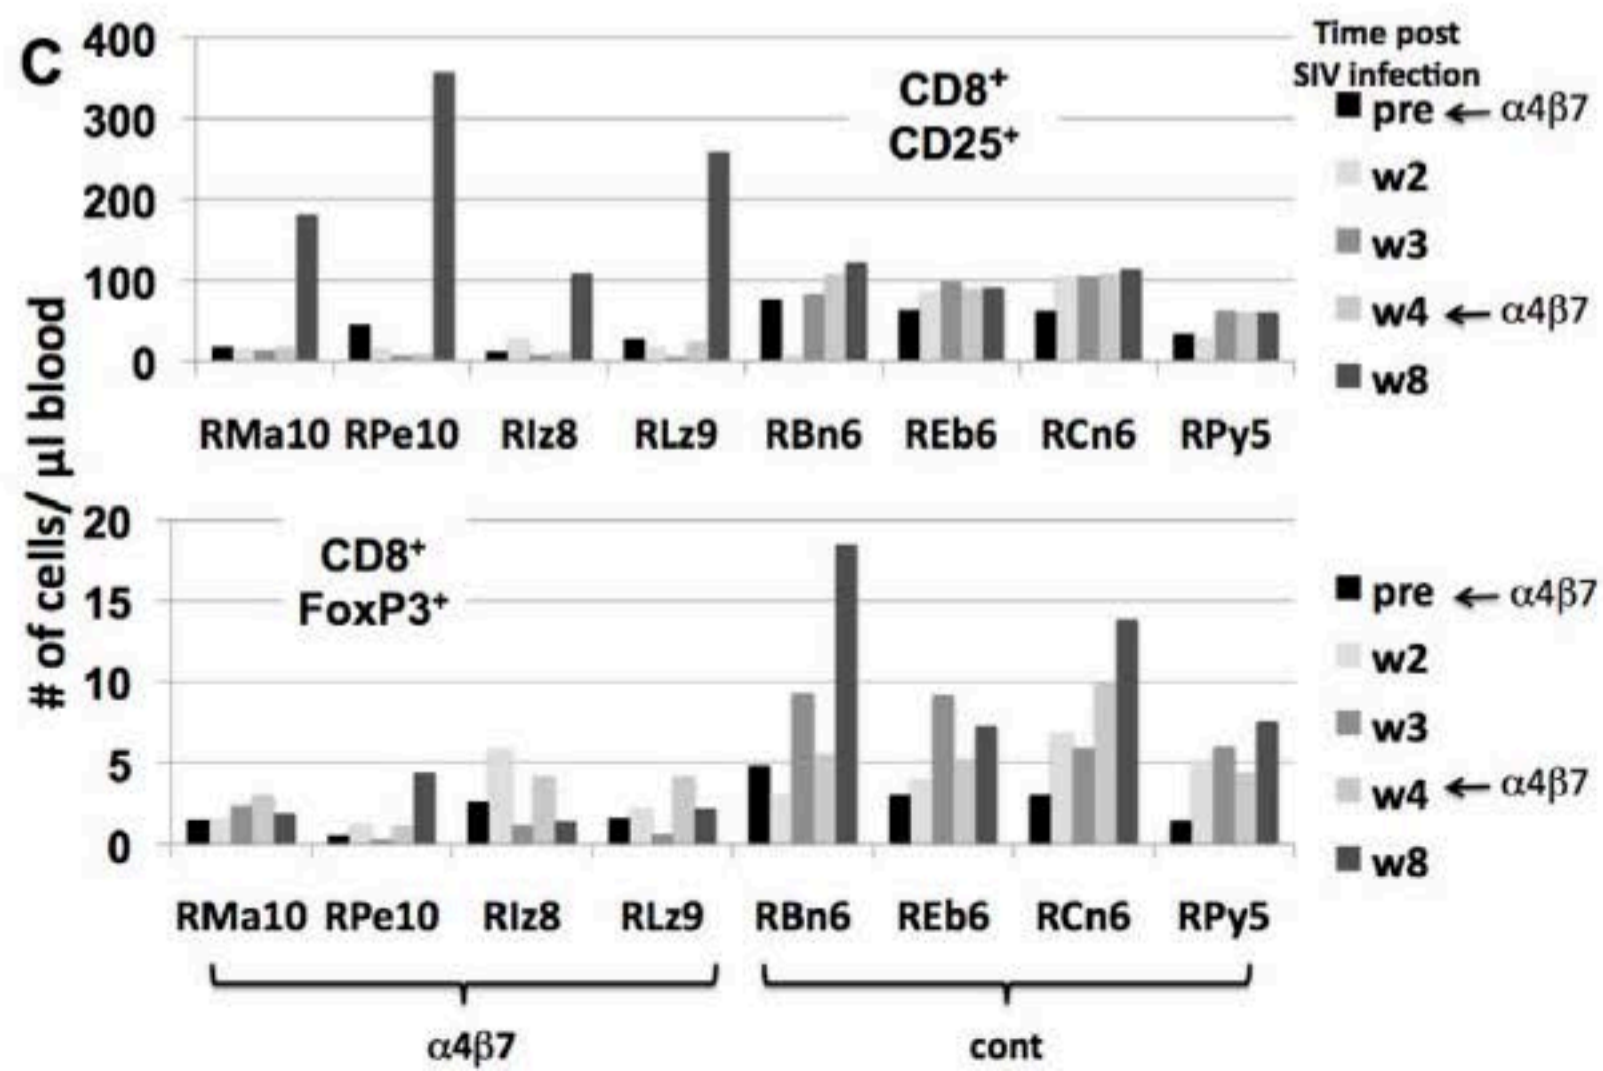

Supplement: NIHMS472235-supplement-Supplementary_Data.pdf [file NIHMS472235-supplement-Supplementary_Data.pdf]
